# Supplementary material for: Effectiveness and Safety of Fufang Danshen Dripping Pill (Cardiotonic Pill) on Blood Viscosity and Hemorheological Factors for Cardiovascular Event Prevention in Patients with Type 2 Diabetes Mellitus: Systematic Review and Meta-Analysis
Source: MDPI journal article supplement (doi:10.3390/medicina59101730), 2023-09-27
Supplement: s1 [file s1]

## Supplement S1. Searching strategy

### 1. MEDLINE (PubMed) 2022.08.21

|    |                                                                                                                                                                         |     |
|----|-------------------------------------------------------------------------------------------------------------------------------------------------------------------------|-----|
| #1 | ((cardiotonic pills) OR (Danshen Dripping Pills) OR (fufang danshen dripping pill) OR (fufang danshen tablet) OR (Fufang Danshen Pian) OR (fufang danshen) OR (复方丹参滴丸)) | 162 |
|----|-------------------------------------------------------------------------------------------------------------------------------------------------------------------------|-----|

### 2. CENTRAL (Cochrane)

|    |                                                                                                                                                                                                   |    |
|----|---------------------------------------------------------------------------------------------------------------------------------------------------------------------------------------------------|----|
| #1 | [mh "fufang danshen"] OR 'fufang danshen':ab,ti OR 'cardiotonic pills':ab,ti OR 'Danshen Dripping Pills':ab,ti OR 'Fufang Danshen Pian':ab,ti OR 'fufang danshen dripping pill':ab,ti OR '复方丹参滴丸' | 63 |
|----|---------------------------------------------------------------------------------------------------------------------------------------------------------------------------------------------------|----|

### 3. EMBASE

|    |                                                                                                                                                                                                                                                  |     |
|----|--------------------------------------------------------------------------------------------------------------------------------------------------------------------------------------------------------------------------------------------------|-----|
| #1 | ' fufang danshen'/exp OR 'fufang danshen pian':ab,ti OR 'cardiotonic pills'/exp OR 'Danshen Dripping Pills':ab,ti OR 'fufang danshen dripping pill'/exp OR 'cardiotonic pills':ab,ti OR 'cardiotonic pills'/exp OR 'fufang danshen tablet':ab,ti | 211 |
|----|--------------------------------------------------------------------------------------------------------------------------------------------------------------------------------------------------------------------------------------------------|-----|

### 4. CNKI

|    |                                                                                                                                                                                                                                                                                                                                                                                                                                                                                                                                                   |       |
|----|---------------------------------------------------------------------------------------------------------------------------------------------------------------------------------------------------------------------------------------------------------------------------------------------------------------------------------------------------------------------------------------------------------------------------------------------------------------------------------------------------------------------------------------------------|-------|
| #1 | (SU="复方丹参滴丸" OR AB="复方丹参滴丸" OR SU="fubang danshen-diwan" OR AB="fubang danshen-diwan" OR SU="cardiotonic pills" OR AB="cardiotonic pills" OR SU="fubang danshen" OR AB="fubang danshen" OR SU="fubang danshen dripping pills" OR AB="fubang danshen dripping pills" OR SU="fubang danshen tablet" OR AB="fubang danshen tablet" OR SU="Fufang Danshen Pian" OR AB="Fufang Danshen Pian") AND (AB="randomized controlled trial" OR AB="clinical trial" OR AB="random allocation" OR AB="randomly allocated" OR AB="random" OR AB="placebo" OR AB=" | 2,199 |
|----|---------------------------------------------------------------------------------------------------------------------------------------------------------------------------------------------------------------------------------------------------------------------------------------------------------------------------------------------------------------------------------------------------------------------------------------------------------------------------------------------------------------------------------------------------|-------|

|  |                                                     |  |
|--|-----------------------------------------------------|--|
|  | 随机对照研究" OR AB="临床随机对照试验" OR AB="随机对照" OR AB="临床试验") |  |
|--|-----------------------------------------------------|--|

## 5. KCI

|    |                           |   |
|----|---------------------------|---|
| #1 | 심적환 AND (당뇨 OR Diabetics) | 2 |
|----|---------------------------|---|

## 6. OASIS

|    |                           |   |
|----|---------------------------|---|
| #1 | 심적환 AND (당뇨 OR Diabetics) | 3 |
|----|---------------------------|---|

## 7. RISS

|    |                           |   |
|----|---------------------------|---|
| #1 | 심적환 AND (당뇨 OR Diabetics) | 9 |
|----|---------------------------|---|

## Supplement S2. Characteristics of Included Studies

| N<br>O. | First<br>author,<br>year | Coun<br>try | Sample<br>size | Age (yr),<br>Mean±SD<br>(range)           | Sex<br>(M:F)         | Disease<br>Duration                           | Disease<br>classification                            | Diagnostic<br>criteria | Treatment group<br>intervention                                                                                                                                  | Control group<br>intervention                                                           |
|---------|--------------------------|-------------|----------------|-------------------------------------------|----------------------|-----------------------------------------------|------------------------------------------------------|------------------------|------------------------------------------------------------------------------------------------------------------------------------------------------------------|-----------------------------------------------------------------------------------------|
| 1       | Guo<br>(2007)            | China       | 39:39          | T) 57.8<br>(46-69)<br>C) 56.6<br>(44-70)  | T: 47:31<br>C: 47:31 | T) 9.6 (5.5–<br>16.5)<br>C) 9.4 (6.5–<br>17.) | early DN                                             | D1                     | CDDP + dietary control<br>(0.8 g/(kg*d) with WM                                                                                                                  | Placebo + dietary<br>control (0.8 g/(kg*d)<br>with WM                                   |
| 2       | Ye<br>(2016)             | China       | 50: 50         | T)<br>67.36±2.01<br>C)<br>64.25±2.22      | T) 24:26<br>C) 23:27 | N/A                                           | DM with<br>asymptomatic<br>myocardial<br>ischemia    | D2                     | CDDP                                                                                                                                                             | Conventional Therapy                                                                    |
| 3       | Zhang<br>(2009)          | China       | 33:32          | T)<br>58.0±11.2<br>C)<br>56.4±8.8         | T) 21:12<br>C) 22:10 | T) 10.4±5.8<br>C) 11.0±6.5                    | DR and DN                                            | D1                     | CDDP 270 mg + Calcium<br>hydroxybenzenesulfonate<br>capsules 500 mg +<br>Dietary control +<br>Diabetic education +<br>Protein 0.8 g (d*kg)+<br>insulin injection | Dietary control +<br>Diabetic education +<br>Protein 0.8 g (d*kg)+<br>insulin injection |
| 4       | Yang<br>(2019)           | China       | 50:50          | T)<br>48.67±2.83<br>C)<br>48.15±2.22      | T) 32:18<br>C) 31:19 | T) 12.21±0.91<br>C) 2.62±0.95                 | DN                                                   |                        | CDDP + irbesartan                                                                                                                                                | irbesartan                                                                              |
| 5       | JIA<br>(2017)            | China       | 50:50          | T)<br>59.58±9.69<br>C)<br>58.06±13.0<br>1 | T) 27:32<br>C) 30:20 |                                               | DN                                                   | D3                     | CDDP + Valsartan                                                                                                                                                 | Valsartan                                                                               |
| 6       | Zhao<br>(2016)           | China       | 37:37          | T)<br>54.2±2.5<br>C)<br>57.8±1.1          | T) 19:18<br>C) 21:16 | T) 1–7 years<br>C) 2–7 years                  | DM with<br>asymptomatic<br>myocardial<br>ischemia    |                        | CDDP + β blockers +<br>calcium blockers and<br>other conventional<br>treatment                                                                                   | β blockers + calcium<br>blockers and other<br>conventional treatment                    |
| 7       | Chen<br>(2018)           | China       | 60:60          | T)<br>68.4±5.6<br>C)<br>68.5±5.5          | T) 35:25<br>C) 33:27 | T) 8.4±2.3<br>C) 8.5±2.2                      | DM Combined<br>with Silent<br>Myocardial<br>Ischemia |                        | CDDP                                                                                                                                                             | conventional treatment                                                                  |

|    |                 |       |         |                                    |                          |                                  |                                                                                            |         |                                                                   |                                                                                                                  |
|----|-----------------|-------|---------|------------------------------------|--------------------------|----------------------------------|--------------------------------------------------------------------------------------------|---------|-------------------------------------------------------------------|------------------------------------------------------------------------------------------------------------------|
| 8  | Gu<br>(2020)    | China | 41:41   | T) 55.8±11.0<br>C) 56.5±10.5       | T) 24:17<br>C) 19:22     | T) 12.5±8.9<br>C) 13.1±8.5       | DPN                                                                                        |         | CDDP                                                              | beloprost sodium                                                                                                 |
| 9  | Huang<br>(2005) | China | 39:40   | T) 57.2 ± 0.4<br>C) 56.9±0.5       | T) 23:16<br>C) 22:18     | -                                | DM with Nailfold capillary abnormalities                                                   | D1      | CDDP + DM med (In case of HT patient`s Enalapril was prescribed.) | DM med (In case of HT patient`s Enalapril was prescribed.)                                                       |
| 10 | Yuan<br>(2013)  | China | 47:47   | 65 ± 5                             | 52 : 42                  | 8.6 ± 1.5                        | early stage renal disease of type 2 DM                                                     | D4      | CDDP + prostaglandin E1                                           | prostaglandin E1                                                                                                 |
| 11 | Jin<br>(2015)   | China | 36 : 36 | T) 68.2 ± 5.2<br>C) 65.1±4.8       | T) 18:18<br>C) 17:19     | 6–14 y                           | DM complicated with asymptomatic myocardial ischemia                                       |         | CDDP                                                              | conventional treatment methods, including hypoglycemic, lipid-lowering and nitrolipid drugs,                     |
| 12 | Lu<br>(2017)    | China | 39 : 39 | T) 43–68<br>C) 45–68               | T) 26 : 13<br>C) 25 : 14 | T) 6–13 y<br>C) 6–12 y           | DM and myocardial ischemia                                                                 |         | CDDP                                                              | conventional treatment methods and the common drugs included hypoglycemic blockers.                              |
| 13 | Li<br>(2015)    | China | 49 : 49 | T) 68.25 ± 4.78<br>C) 67.85 ± 4.64 | T) 28 : 21<br>C) 30 : 19 | T) 5.33 ± 1.81<br>C) 5.12 ± 1.78 | DM complicated with asymptomatic myocardial ischemia                                       |         | CDDP                                                              | conventional treatment such as glucose lowering, blood pressure lowering, lipid lowering and p-receptor blockers |
| 14 | Lin<br>(2017)   | China | 35 : 35 | T) 57.2 ± 8.7<br>C) 58.5 ± 7.9     | T) 24 : 11<br>C) 22: 13  | T) 6.97 ± 5.23<br>C) 6.41 ± 5.64 | DPN                                                                                        | D3 & D4 | CDDP                                                              | oral Mecobalamin tablet                                                                                          |
| 15 | Wang<br>(2016)  | China | 39 : 39 | T) 55.9 ± 12.4<br>C) 56.4±12.3     | T) 26 : 13<br>C) 27 :12  | T) 9.5 ± 3.7<br>C) 9.2 ± 3.6     | DM with asymptomatic myocardial ischemia and excluded the dysfunction of heart, kidney and | -       | CDDP                                                              | routine treatment such as β Receptor blockers, hypoglycemic, lipid-lowering, calcium blockers, etc.              |

|           |                |       |         |                                          |                                |                                  | other important<br>organs and mental<br>disorders                |    |                                         |                                                                                  |
|-----------|----------------|-------|---------|------------------------------------------|--------------------------------|----------------------------------|------------------------------------------------------------------|----|-----------------------------------------|----------------------------------------------------------------------------------|
| <b>16</b> | Wang<br>(2015) | China | 39 : 39 | T) 66.26 ±<br>0.74<br>C) 66.25 ±<br>0.75 | T) 19 :<br>20<br>C) 20 :<br>19 | T) 7.24 ± 0.15<br>C) 7.25 ± 0.14 | DM complicated<br>with<br>asymptomatic<br>myocardial<br>ischemia | -  | CDDP                                    | routine treatment. (β<br>Receptor blockers,<br>calcium blockers and<br>nitrates) |
| <b>17</b> | Yin<br>(2017)  | China | 35 : 35 | T) 57.6 ±<br>4.1<br>C) 58.8 ±<br>7.2     | T) 19 :<br>16<br>C) 18 :<br>17 | T) 8.9±1.6<br>C) 9.5 ± 2.5       | DM and 24-hour<br>urinary protein ≥<br>30 mg                     | D4 | CDDP                                    | irbesartan                                                                       |
| <b>18</b> | Bai<br>(2008)  | China | 48 : 48 | T) 68±4<br>C) 67±5                       | T) 27 :<br>21<br>C) 26 :<br>22 | T) 8.9±1.5<br>C) 8.7±1.6         | early DN                                                         | -  | CDDP + irbesartan<br>(amboveide) orally | irbesartan (amboveide)                                                           |

DN: Diabetic Nephropathy; DPN: Diabetic Peripheral Neuropathy; DR: Diabetic Retinopathy, DM: Diabetes Mellitus.

D1) 1997 ADA Criteria, diagnostic staging method of diabetic nephropathy in Mogensen, Denmark; D2) Diagnosis of DM complicated with asymptomatic myocardial ischemia; D3) 2013 edition of the Chinese Diabetes Prevention and Control Guidelines; D4) WHO criteria for the diagnosis of type 2 diabetes.

Supplement S3. Details of Clinical trial Results of Included Studies

| First author, year | Treatment duration (Dosage /day) | Outcome Variable            | Effective Results                                                            | Adverse Events    |
|--------------------|----------------------------------|-----------------------------|------------------------------------------------------------------------------|-------------------|
| Guo (2007)         | 8 Week, tid*10 pills             | ① TER                       | ① 12.02±1.43*Δ vs 18.83±3.64                                                 | NR                |
|                    |                                  | ② Microalbumin test         | ② 1.88±0.55*Δ vs 2.75±1.33 / 0.18±0.08*Δ vs 0.25±0.07                        |                   |
|                    |                                  | ③ Beta 2 Microglobulin test | ③ 6.14±1.70** vs 6.24±1.57                                                   |                   |
|                    |                                  | ④ FBG                       | ④ 5.42±0.66**ΔΔ vs 7.60±0.63                                                 |                   |
|                    |                                  | ⑤ TC                        | ⑤ 1.96±0.81**ΔΔ vs 3.44±0.78                                                 |                   |
|                    |                                  | ⑥ TG                        | ⑥ 1.55±0.25*Δ vs 1.43±0.23                                                   |                   |
|                    |                                  | ⑦ HDL-C                     | ⑦ 8.48±1.75**Δ vs 9.75±1.68                                                  |                   |
|                    |                                  | ⑧ LSR                       | ⑧ 4.68±1.50** vs 4.96±1.66                                                   |                   |
|                    |                                  | ⑨ HSR                       | ⑨ 1.80±0.79* vs 2.00±0.76                                                    |                   |
|                    |                                  | ⑩ PV                        | ⑩ 2.90±0.78** vs 3.12±0.78                                                   |                   |
|                    |                                  | ⑪ Fibrinogen                |                                                                              |                   |
| Ye (2016)          | 10 pills (270mg)                 | ① Hcy                       | ① 6.04±1.24 vs 19.84±5.14                                                    | NR                |
|                    |                                  | ② PA                        | ② 8.34±1.41* vs 11.21±4.14*                                                  |                   |
| Zhang (2009)       | 3 months, tid*10pills(270mg)     | ① TER                       | ① Ameliorate 60.60*vs21.87 / Stable 36.36vs59.38 / Deteriorate 3.04**vs18.75 | deteriorate (n=6) |
|                    |                                  | ② LSR                       | ② 8.6±1.6 vs 10.6±1.7                                                        |                   |
|                    |                                  | ③ HSR                       | ③ 4.9±0.7 vs 5.7±0.8                                                         |                   |
|                    |                                  | ④ PV                        | ④ 1.5±0.3* vs 1.7±0.3                                                        |                   |
|                    |                                  | ⑤ Platelet adhesion         | ⑤ 44±12* vs 53±10                                                            |                   |
|                    |                                  | ⑥ Platelet aggregation rate | ⑥ 55±14 vs 64±11                                                             |                   |
|                    |                                  | ⑦ Sr                        | ⑦ 126±34* vs 102±28Δ                                                         |                   |
|                    |                                  | ⑧ BUN                       | ⑧ 6.8±1.7* vs 6.0±1.8Δ                                                       |                   |
|                    |                                  | ⑨ 24h Urine test            | ⑨ 204±70* vs 149±80Δ                                                         |                   |
| Yang (2019)        | 1 month, tid*1 pills             | ① TER                       | ① 50 vs 37                                                                   | C) n=1<br>T) n=2  |
|                    |                                  | ② Serum albumin             | ② 31.11±3.26 vs 33.21±4.53                                                   |                   |
|                    |                                  | ③ Serum urea                | ③ 11.25±1.24 vs 22.45±3.55                                                   |                   |
|                    |                                  | ④ Serum creatinine          | ④ 322.45±12.01 vs 452.62±12.77                                               |                   |
|                    |                                  | ⑤ ESR                       | ⑤ 9.23±0.21 vs 10.11±0.41                                                    |                   |
|                    |                                  | ⑥ WBV                       | ⑥ 4.12±0.13 vs 5.01±0.34                                                     |                   |
|                    |                                  | ⑦ PV                        | ⑦ 1.66±0.21 vs 1.82±0.11                                                     |                   |

|                 |                        |                                                                                                                                                                                                                                                                                                                         |                                                                                                                                                                                                                                                                                                                                                                                 |                                  |
|-----------------|------------------------|-------------------------------------------------------------------------------------------------------------------------------------------------------------------------------------------------------------------------------------------------------------------------------------------------------------------------|---------------------------------------------------------------------------------------------------------------------------------------------------------------------------------------------------------------------------------------------------------------------------------------------------------------------------------------------------------------------------------|----------------------------------|
| JIA<br>(2017)   | 12weeks, tid*405mg     | ① ACR<br>② WBV<br>③ PV                                                                                                                                                                                                                                                                                                  | ① 6.06±3.56 vs 5.23±3.11(P=0.2209)<br>② 5.83±0.86 vs 5.47±0.87(P=0.0388)<br>③ 3.50±0.94 vs 3.60±0.82(P=0.5738)                                                                                                                                                                                                                                                                  | NR                               |
| Zhao<br>(2016)  | Tid*10 pills           | ① TER<br>② PA<br>③ Hcy                                                                                                                                                                                                                                                                                                  | ① 87. 5 vs 57. 5<br>② 9. 24 ± 1. 57 vs 5. 45 ± 1. 38 *<br>③ 9. 86 ± 5. 38 vs 18. 29 ± 4. 71 *                                                                                                                                                                                                                                                                                   | NR                               |
| Chen<br>(2018)  | 8 weeks, tid*10 pills  | ① TER<br>② Hcy<br>③ APN<br>④ WBC(10 <sup>9</sup> )<br>⑤ RBC(10 <sup>12</sup> )<br>⑥ Platelet(10 <sup>9</sup> )<br>⑦ TC<br>⑧ TG<br>⑨ LDL-C<br>⑩ HDL-C                                                                                                                                                                    | ① 50 vs 58<br>② 19.22±5.12 vs 11.23±4.45(P=0.000)<br>③ 4.53±1.05 vs 8.30±1.34(P=0.000)<br>④ 5.78±0.26 vs 5.88±0.25(P=0.034)<br>⑤ 4.56±0.07 vs 4.69±0.08(P=0.000)<br>⑥ 163.21±2.33 vs 165.33±2.32(P=0.000)<br>⑦ 5.63±1.17 vs 5.18±1.22(P=0.041)<br>⑧ 1.85±0.16 vs 1.40±0.21(P=0.000)<br>⑨ 3.86±1.42 vs 3.23±1.53(P=0.021)<br>⑩ 1.19±0.45 vs 1.68±0.47(P=0.000)                   | T) 10.00%<br>n=6<br>C) 8.33% n=6 |
| Gu<br>(2020)    | 3 months, tid*10 pills | ① TER<br>② median nerve MCV<br>③ median nerve SCV<br>④ common peroneal nerve MCV<br>⑤ common peroneal nerve SCV(m/s)<br>⑥ Abnormal foot pressure perception score<br>⑦ MnSi Symptom questionnaire scores<br>⑧ MnSi foot test score<br>⑨ VAS<br>⑩ WBV<br>⑪ PV<br>⑫ platelet aggregation rate<br>⑬ platelet adhesion rate | ① 92.6 vs 77.8<br>② 47.34±1.91* vs 51.05±2.11*#<br>③ 46.47±1.93* vs 48.95±2.13*#<br>④ 46.99±1.93* vs 49.73±1.95*#<br>⑤ 49.33±2.11* vs 51.97±2.01*#<br>⑥ 6.2±2.5* vs 5.1±1.6*#<br>⑦ 6.7±1.6* vs 5.1±1.4*#<br>⑧ 3.4±1.3* vs 2.1±1.0*#<br>⑨ 2.6±1.3* vs 1.4±0.8*#<br>⑩ 11.4±1.6* vs 9.6±1.2*#<br>⑪ 2.0±0.5* vs 1.5±0.3*#<br>⑫ 26.9±5.5* vs 21.2±4.3*#<br>⑬ 41.7±7.0* vs 38.2±5.1*# | NR                               |
| Huang<br>(2005) | 3 weeks, tid*10 pills  | ① TC<br>② TG<br>③ LSR<br>④ HSR<br>⑤ PV                                                                                                                                                                                                                                                                                  | ① 3.55±1.21** vs 6.35±1.21<br>② 1.38±0.86 ** vs 2.38±0.86 *<br>③ 8.21±1.47** vs 10.86±1.59<br>④ 3.02±0.19**vs 4.19±0.62 *<br>⑤ 1.63±0.16** vs 1.87±0.19                                                                                                                                                                                                                         | mild headache<br>(n = 2)         |

|                |                                |                                              |                                                                                                                                                                   |                    |
|----------------|--------------------------------|----------------------------------------------|-------------------------------------------------------------------------------------------------------------------------------------------------------------------|--------------------|
|                |                                | ⑥ Hct                                        | ⑥ $2.07 \pm 0.49$ *vs $2.61 \pm 0.59$                                                                                                                             |                    |
|                |                                | ⑦ ESR                                        | ⑦ $40.96 \pm 2.92$ vs $41.98 \pm 3.23$                                                                                                                            |                    |
| Yuan<br>(2013) | 4 weeks, tid*10 pills          | ① Creatinine                                 | ① $76 \pm 13$ vs $79 \pm 10$                                                                                                                                      | NR                 |
|                |                                | ② Blood urea nitrogen                        | ② $5.5 \pm 1.4$ vs $5.6 \pm 1.4$                                                                                                                                  |                    |
|                |                                | ③ 24-hour urine total protein                | ③ $0.12 \pm 0.06$ * vs $0.18 \pm 0.011$                                                                                                                           |                    |
|                |                                | ④ AER                                        | ④ $61.5 \pm 9.8$ vs $73.6 \pm 9.1$                                                                                                                                |                    |
|                |                                | ⑤ HSR                                        | ⑤ $6.1 \pm 0.6$ * vs $7.1 \pm 0.5$                                                                                                                                |                    |
|                |                                | ⑥ LSR                                        | ⑥ $10.0 \pm 3.2$ * vs $13.8 \pm 2.0$                                                                                                                              |                    |
|                |                                | ⑦ PV                                         | ⑦ $1.7 \pm 0.6$ * vs $2.1 \pm 0.5$                                                                                                                                |                    |
|                |                                | ⑧ Fibrinogen                                 | ⑧ $2.9 \pm 0.3$ * vs $3.7 \pm 0.8$                                                                                                                                |                    |
| Jin<br>(2015)  | 1 year, tid* 10 pills(270mg)   | ① Hcy                                        | ① $8.29 \pm 1.42$ * vs $6.15 \pm 1.45$ *                                                                                                                          | NR                 |
|                |                                | ② PA                                         | ② $11.2 \pm 4.8$ * vs $19.4 \pm 5.7$ *                                                                                                                            |                    |
| Lu<br>(2017)   | 2 months, tid                  | ① Hcy                                        | ① $11.3 \pm 4.2$ * vs $19.5 \pm 5.6$ *                                                                                                                            | NR                 |
|                |                                | ② PA                                         | ② $8.31 \pm 1.42$ vs $6.22 \pm 1.48$                                                                                                                              |                    |
| Li<br>(2015)   | 2 months, tid*10 pills         | ① Hcy                                        | ① $11.21 \pm 5.11$ * vs $19.25 \pm 5.12$ *                                                                                                                        | NR                 |
|                |                                | ② APN                                        | ② $8.87 \pm 1.12$ * vs $6.17 \pm 1.89$ *                                                                                                                          |                    |
| Lin<br>(2017)  | 3 months, tid*10 pills         | ① LSR                                        | ① $17.25 \pm 4.05$ vs $20.48 \pm 4.58$                                                                                                                            | NR                 |
|                |                                | ② HSR                                        | ② $4.85 \pm 2.16$ vs $5.54 \pm 2.78$                                                                                                                              |                    |
|                |                                | ③ PV                                         | ③ $1.60 \pm 0.17$ vs $35.21 \pm 3.95$                                                                                                                             |                    |
|                |                                | ④ Hct                                        | ④ $35.21 \pm 3.95$ vs $39.47 \pm 4.12$                                                                                                                            |                    |
|                |                                | ⑤ sensory nerve conduction velocity          | ⑤ $46.94 \pm 13.37$ vs $47.06 \pm 13.95$ / $55.83 \pm 8.74$ vs $56.74 \pm 10.38$ / $49.32 \pm 10.8$ vs $49.84 \pm 11.54$ / $45.05 \pm 10.77$ vs $45.85 \pm 10.89$ |                    |
| Wang<br>(2016) | 8 weeks, tid*10 pills (270 mg) | ① Hcy                                        | ① $11.3 \pm 4.2$ vs $19.5 \pm 5.6$ (P<0.05)                                                                                                                       | NR                 |
|                |                                | ② PA                                         | ② $8.31 \pm 1.42$ vs $6.22 \pm 1.48$ (P<0.05)                                                                                                                     |                    |
| Wang<br>(2015) | 2 months, tid*10 pills (270mg) | ① APN                                        | ① $8.32 \pm 1.51$ * vs $6.12 \pm 1.31$                                                                                                                            | NR                 |
|                |                                | ② Hcy                                        | ② $11.25 \pm 4.48$ * vs $20.15 \pm 5.09$                                                                                                                          |                    |
| Yin<br>(2017)  | 3 months, tid*10 pills         | ① Scr( $\mu\text{mol} \cdot \text{L}^{-1}$ ) | ① $86.46 \pm 21.35$ * vs $95.41 \pm 26.45$ *                                                                                                                      | Dizziness (1 vs 3) |
|                |                                | ② BUN                                        | ② $5.28 \pm 1.27$ * vs $5.79 \pm 1.35$ *                                                                                                                          | nausea,            |
|                |                                | ③ Beta 2 Microglobulin test                  | ③ $371.67 \pm 172.53$ * vs $521.52 \pm 225.38$ *                                                                                                                  | vomiting (1 vs 3)  |
|                |                                | ④ 24h Urine test                             | ④ $208.14 \pm 21.36$ * vs $246.78 \pm 25.76$ *                                                                                                                    | lower limb         |
|                |                                | ⑤ HSR                                        | ⑤ $6.07 \pm 0.56$ * vs $6.92 \pm 0.53$ *                                                                                                                          | pain (0 vs 2)      |
|                |                                | ⑥ LSR                                        | ⑥ $10.05 \pm 0.53$ vs $13.76 \pm 0.32$ *                                                                                                                          |                    |
|                |                                | ⑦ PV                                         |                                                                                                                                                                   |                    |



|            |                        |                                      |                                          |                               |
|------------|------------------------|--------------------------------------|------------------------------------------|-------------------------------|
|            |                        | ⑧ Fibrinogen                         | ⑦ $1.51 \pm 0.25^*$ vs $1.95 \pm 0.41^*$ | diarrhea (1 vs 3)             |
|            |                        |                                      | ⑧ $2.68 \pm 0.24^*$ vs $3.55 \pm 0.48^*$ |                               |
| Bai (2008) | 16 weeks, tid*10 pills | ① HSR                                | ① $6.2 \pm 0.6^*$ vs $7.2 \pm 0.5$       | No side effects were reported |
|            |                        | ② LSR                                | ② $10.1 \pm 3.2^*$ vs $13.9 \pm 2.0$     |                               |
|            |                        | ③ PV                                 | ③ $1.7 \pm 0.6^*$ vs $2.2 \pm 0.5$       |                               |
|            |                        | ④ Fibrinogen                         | ④ $2.9 \pm 0.3^*$ vs $3.8 \pm 0.9$       |                               |
|            |                        | ⑤ Hct                                | ⑤ $0.38 \pm 0.05^*$ vs $0.53 \pm 0.04$   |                               |
|            |                        | ⑥ TC                                 | ⑥ $4.8 \pm 0.6^*$ vs $6.5 \pm 0.4$       |                               |
|            |                        | ⑦ TG                                 | ⑦ $2.45 \pm 0.28$ vs $1.52 \pm 0.27^*$   |                               |
|            |                        | ⑧ HDL-C                              | ⑧ $1.07 \pm 0.35$ vs $1.11 \pm 0.26$     |                               |
|            |                        | ⑨ LDL-C                              | ⑨ $3.64 \pm 0.21^*$ vs $4.02 \pm 0.45$   |                               |
|            |                        | ⑩ Creatinine                         | ⑩ $75 \pm 13$ vs $79 \pm 10$             |                               |
|            |                        | ⑪ BUN                                | ⑪ $5.7 \pm 1.4$ vs $5.6 \pm 1.4$         |                               |
|            |                        | ⑫ Serum creatinine clearance(ml/min) | ⑫ $83.0 \pm 26.8$ vs $83.8 \pm 24.6$     |                               |
|            |                        | ⑬ 24h Urine test                     | ⑬ $120 \pm 60^*$ vs $190 \pm 50^*$       |                               |
|            |                        | ⑭ Urinary albumin excretion rate     | ⑭ $61.4 \pm 9.8^*$ vs $73.5 \pm 9.1^*$   |                               |

Hcy: Homocysteine ( $\mu\text{mol/L}$ ); HSR: high shear rate viscosity (mpa/s); LSR: low shear rate viscosity (mpa/s); PA: plasma adiponectin (mg/L); PV: plasma viscosity (mpa/s); WBV: whole blood viscosity (mpa/s); 24 h Urine protein: 24-hour quantitative determination of urinary protein (m/mg); 24 h Urine test: 24-hour Urine quantitative protein (mg/24 h).

Unit of each outcome variables: ACR (mg/mmol); AER ( $\mu\text{g/min}$ ); APN (mg/L); Beta 2 Microglobulin test (mg/L); Blood urea nitrogen (mmol/L); BUN (mmol/L); Creatinine ( $\mu\text{mol/L}$ ); FBG (mmol/L); Fibrinogen (g/L); Hcy ( $\mu\text{mol/L}$ ); HDL-C (mmol/L); LDL-C (mmol/L); Microalbumin test ( $\mu\text{g/min}$ ); PA (mg/L); Platelet adhesion (%); Platelet aggregation rate (%); Plasma viscosity (mpa/s); Serum albumin (g/L); Serum creatinine (mmol/L); Serum creatinine clearance (mL/min); Serum urea (mmol/L); Sr ( $\mu\text{mol/L}$ ); TC (mmol/L); TER (%); TG (mmol/L); Urinary albumin excretion rate ( $\mu\text{g/min}$ ); Whole blood viscosity (mpa/s); 24-hour urine total protein (g/24 h).

(A)

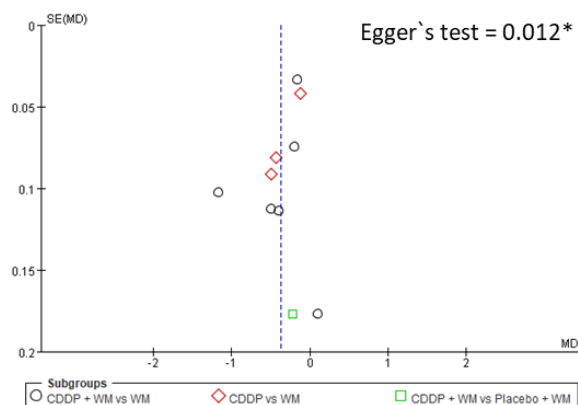

(B)

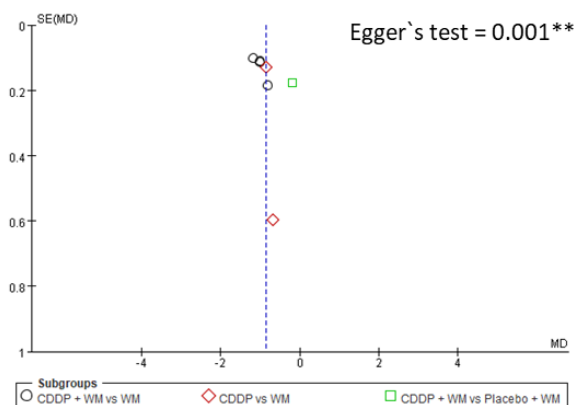

(C)

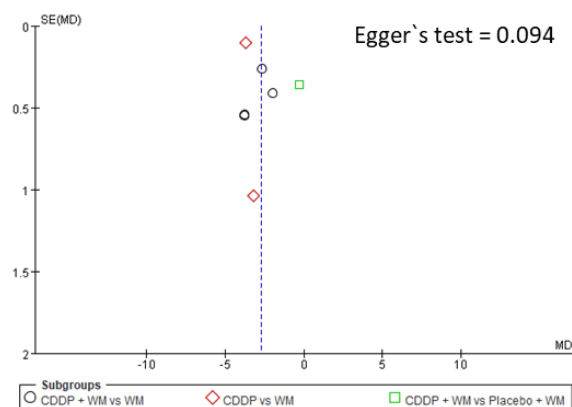

(D)

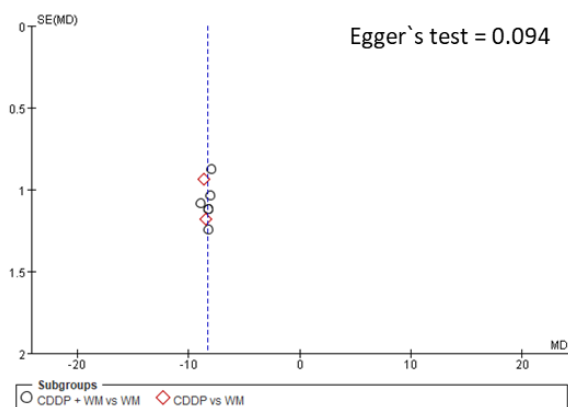

(E)

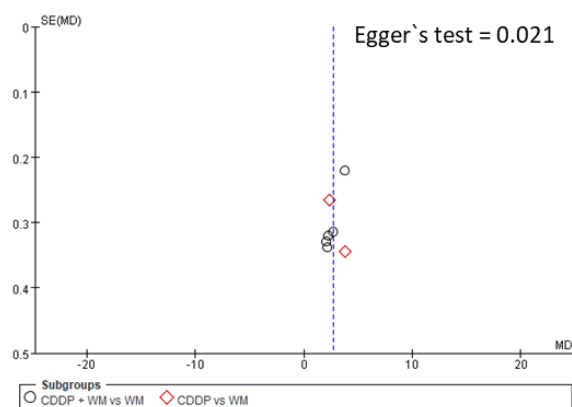

**Supplement S4.** Funnel plot illustrating publication bias. (A) Plasma viscosity, (B) high shear rate, (C) low shear rate, (D) homocysteine, and (E) plasma adiponectin.

**Supplement S5.** GRADE assessment of included studies.

| Certainty assessment |              |              |               |              |             |                      | № of patients |         | Effect            |                   | Certainty | Importance |
|----------------------|--------------|--------------|---------------|--------------|-------------|----------------------|---------------|---------|-------------------|-------------------|-----------|------------|
| № of studies         | Study design | Risk of bias | Inconsistency | Indirectness | Imprecision | Other considerations | CDDP          | Control | Relative (95% CI) | Absolute (95% CI) |           |            |

**Plasma viscosity**

|    |                   |                          |                      |             |             |      |     |     |   |                                                    |                  |  |
|----|-------------------|--------------------------|----------------------|-------------|-------------|------|-----|-----|---|----------------------------------------------------|------------------|--|
| 10 | randomized trials | not serious <sup>a</sup> | serious <sup>b</sup> | not serious | not serious | none | 417 | 417 | - | MD <b>0.37 lower</b><br>(0.54 lower to 0.19 lower) | ⊕⊕⊕○<br>Moderate |  |
|----|-------------------|--------------------------|----------------------|-------------|-------------|------|-----|-----|---|----------------------------------------------------|------------------|--|

**High Shear Rate**

|   |                   |             |                      |             |             |      |     |     |   |                                                    |                  |  |
|---|-------------------|-------------|----------------------|-------------|-------------|------|-----|-----|---|----------------------------------------------------|------------------|--|
| 7 | randomized trials | not serious | serious <sup>b</sup> | not serious | not serious | none | 276 | 276 | - | MD <b>0.86 lower</b><br>(1.08 lower to 0.63 lower) | ⊕⊕⊕○<br>Moderate |  |
|---|-------------------|-------------|----------------------|-------------|-------------|------|-----|-----|---|----------------------------------------------------|------------------|--|

**Low Shear Rate**

|   |                   |             |             |             |             |      |     |     |   |                                                    |              |  |
|---|-------------------|-------------|-------------|-------------|-------------|------|-----|-----|---|----------------------------------------------------|--------------|--|
| 7 | randomized trials | not serious | not serious | not serious | not serious | none | 276 | 276 | - | MD <b>2.74 lower</b><br>(3.77 lower to 1.72 lower) | ⊕⊕⊕⊕<br>High |  |
|---|-------------------|-------------|-------------|-------------|-------------|------|-----|-----|---|----------------------------------------------------|--------------|--|

**Homocysteine**

| Certainty assessment |                   |              |               |              |             |                      | № of patients |         | Effect            |                                             | Certainty    | Importance |
|----------------------|-------------------|--------------|---------------|--------------|-------------|----------------------|---------------|---------|-------------------|---------------------------------------------|--------------|------------|
| № of studies         | Study design      | Risk of bias | Inconsistency | Indirectness | Imprecision | Other considerations | CDDP          | Control | Relative (95% CI) | Absolute (95% CI)                           |              |            |
| 8                    | randomized trials | not serious  | not serious   | not serious  | not serious | none                 | 349           | 349     | -                 | MD 8.32 lower<br>(9.05 lower to 7.58 lower) | ⊕⊕⊕⊕<br>High |            |

#### Plasma Adiponectin

|   |                   |             |             |             |             |      |     |     |   |                                                |              |  |
|---|-------------------|-------------|-------------|-------------|-------------|------|-----|-----|---|------------------------------------------------|--------------|--|
| 7 | randomized trials | not serious | not serious | not serious | not serious | none | 310 | 310 | - | MD 2.72 higher<br>(2.13 higher to 3.32 higher) | ⊕⊕⊕⊕<br>High |  |
|---|-------------------|-------------|-------------|-------------|-------------|------|-----|-----|---|------------------------------------------------|--------------|--|
